# Supplementary material for: Selection on Sperm Count, but Not on Sperm Morphology or Velocity, in a Wild Population of Anolis Lizards
Source: MDPI journal article supplement (doi:10.3390/cells10092369), 2021-09-09
Supplement: s1 [file s1]

---

Article

# Selection on sperm count, but not on sperm morphology or velocity in a wild population of *Anolis* lizards

Ariel F. Kahlr<sup>1,2\*</sup>, Matthew C. Kustra<sup>2,3</sup>, Aaron M. Reedy<sup>2,4</sup>, Rachana S. Bhav<sup>2</sup>, Heidi A. Seeers<sup>2</sup>, Daniel A. Warner<sup>4</sup>, and Robert M. Cox<sup>2</sup>

<sup>1</sup> Stockholm University, Zoologiska institutionen: Etologi, Stockholm, 106 91, Sweden

<sup>2</sup> Department of Biology, University of Virginia, Charlottesville, VA 22904, USA

<sup>3</sup> Department of Ecology and Evolutionary Biology, University of California, Santa Cruz, CA 95064, USA

<sup>4</sup> Department of Biological Sciences, Auburn University, Auburn, AL 36849, USA

\* Correspondence: ariel.kahlr@zoologi.su.se

## Supplemental Figures and Tables

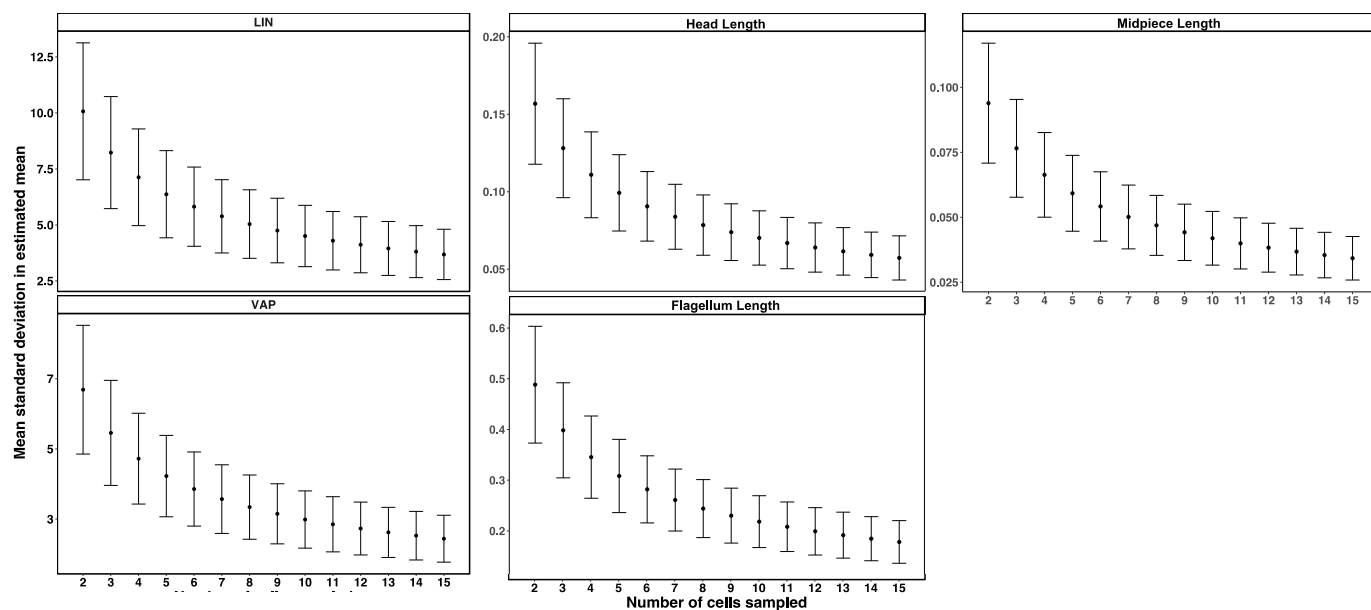

**Figure S1.** We used repeated resampling to validate the use of 15 sperm cells for our measurement of linearity (LIN) and sperm velocity (VAPi) and sperm head, midpiece and flagellum lengths. For each increment and male, we resampled 10,000 iterations and then calculated the standard deviation of the estimated means. Points are the mean standard deviation across males and error bars are one standard deviation.

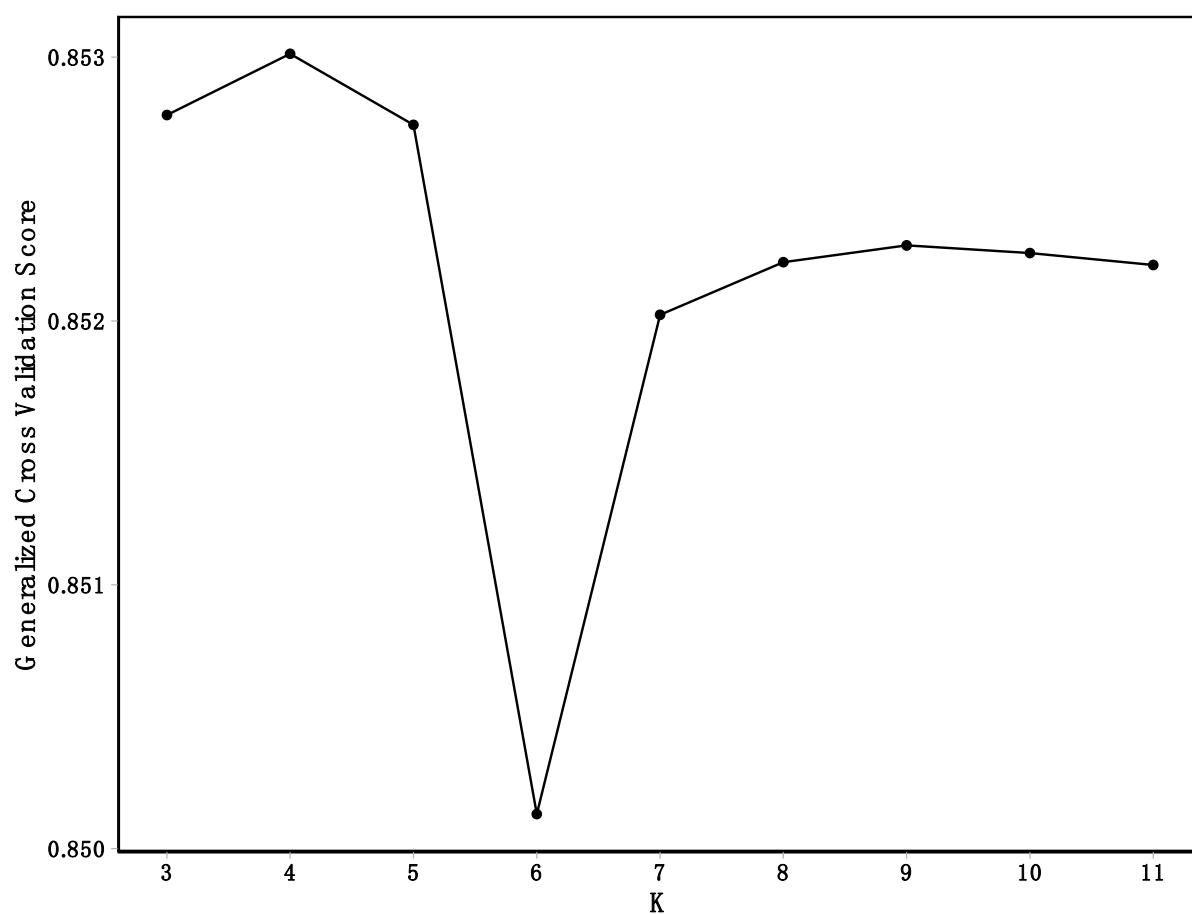

**Figure S2.** Generalized cross validation scores for different K values (smoothing parameter) of the GAM with relative fitness as a function of standardized sperm count. Lower generalized cross validation score indicates better model fit. The K value with the best fit (6) was used for generating Figure 1.

**Table S1.** Summary statistics of sperm parameters, body size, and paternity for 171 male *Anolis sagrei*. Means and standard errors of each trait for all males are presented, as well as the mean and standard error of within-male variation (coefficient of variation, CV) calculated for each trait of each male when appropriate.

| Trait                                        | Mean $\pm$ Standard Error               | Within-male variation, mean CV | Range                                 |
|----------------------------------------------|-----------------------------------------|--------------------------------|---------------------------------------|
| Sperm Count                                  | $5.97 \times 10^6 \pm 2.08 \times 10^5$ | NA                             | $2.00 \times 10^4 - 1.59 \times 10^7$ |
| Velocity (VAPi) ( $\mu\text{m}/\text{sec}$ ) | $50.33 \pm 0.59$                        | $0.17 \pm 0.0039$              | 25.13 – 71.61                         |
| Linearity (%)                                | $45.86 \pm 1.01$                        | $0.33 \pm 0.0068$              | 19.17 – 84.75                         |
| Head length ( $\mu\text{m}$ )                | $13.87 \pm 0.02$                        | $0.017 \pm 0.0003$             | 13.09 – 14.43                         |
| Midpiece length ( $\mu\text{m}$ )            | $2.49 \pm 0.009$                        | $0.059 \pm 0.001$              | 2.16 – 2.86                           |
| Flagellum length ( $\mu\text{m}$ )           | $75.08 \pm 0.09$                        | $0.011 \pm 0.001$              | 70.38 – 77.95                         |
| Total sperm length ( $\mu\text{m}$ )         | $91.45 \pm 0.09$                        | $0.001 \pm 0.0001$             | 86.68 – 94.32                         |
| Snout-vent length (mm)                       | $55.64 \pm 0.36$                        | NA                             | 39 – 65                               |
| No. Offspring sired                          | $6.02 \pm 0.43$                         | NA                             | 0 – 27                                |

**Table S2.** Sample sizes for genotyping and phenotyping with exclusion criteria. Potential sires and dams were present between April and October 2015, while 2015 offspring were captured between July–August 2015 and May 2016. Ejaculate sampling occurred only on the May 2015 census trip.

|                                     | Included | Excluded | Reason for exclusion                                                               |
|-------------------------------------|----------|----------|------------------------------------------------------------------------------------|
| Potential sires captured in 2015    | 331      |          |                                                                                    |
| Genotyped                           | 307      | 24       | No DNA ( $n = 19$ ) or >50% missing loci ( $n = 5$ )                               |
| Identified as 2015 sires            | 200      | 107      | No parentage match in SNPPIT ( $n = 102$ ) or >50 loci (23%) missing ( $n = 5$ ).  |
| Potential dams captured in 2015     | 638      |          |                                                                                    |
| Genotyped                           | 580      | 58       | No DNA ( $n = 32$ ) or >50% missing loci ( $n = 26$ )                              |
| Identified as 2015 dams             | 381      | 199      | No parentage match in SNPPIT ( $n = 185$ ) or >50 loci (23%) missing ( $n = 14$ ). |
| Offspring from 2015 cohort          | 2060     |          |                                                                                    |
| Genotyped                           | 1981     | 79       | No DNA ( $n = 26$ ) or >50% missing loci ( $n = 53$ )                              |
| Assigned parentage at $FDR < 0.005$ | 1185     | 796      | No parentage match in SNPPIT                                                       |
| Males captured in May 2015          | 211      |          |                                                                                    |
| Sampled for ejaculates              | 202      | 9        | Immature male or no ejaculate                                                      |
| Phenotyped for sperm count          | 202      | 0        |                                                                                    |
| Phenotyped for sperm morphology     | 198      | 4        | Few or no sperm cells on slide                                                     |
| Phenotyped for sperm velocity       | 184      | 18       | Sperm crowded or non-motile                                                        |
| Included in selection analysis      | 171      | 40       | Missing phenotype or genotype                                                      |
